# Supplementary material for: Neutrophil extracellular trap-associated RNA and LL37 enable self-amplifying inflammation in psoriasis
Source: PubMed Central journal article supplement (PMC6949246; doi:10.1038/s41467-019-13756-4), 2020-01-08
Supplement: 41467_2019_13756_MOESM1_ESM.pdf [file 41467_2019_13756_MOESM1_ESM.pdf]

**SUPPLEMENTARY INFORMATION**

**Neutrophil-extracellular trap-associated RNA (naRNA) and LL37  
enable self-amplifying inflammation in psoriasis**

By Herster et al.

**Supplementary Figures**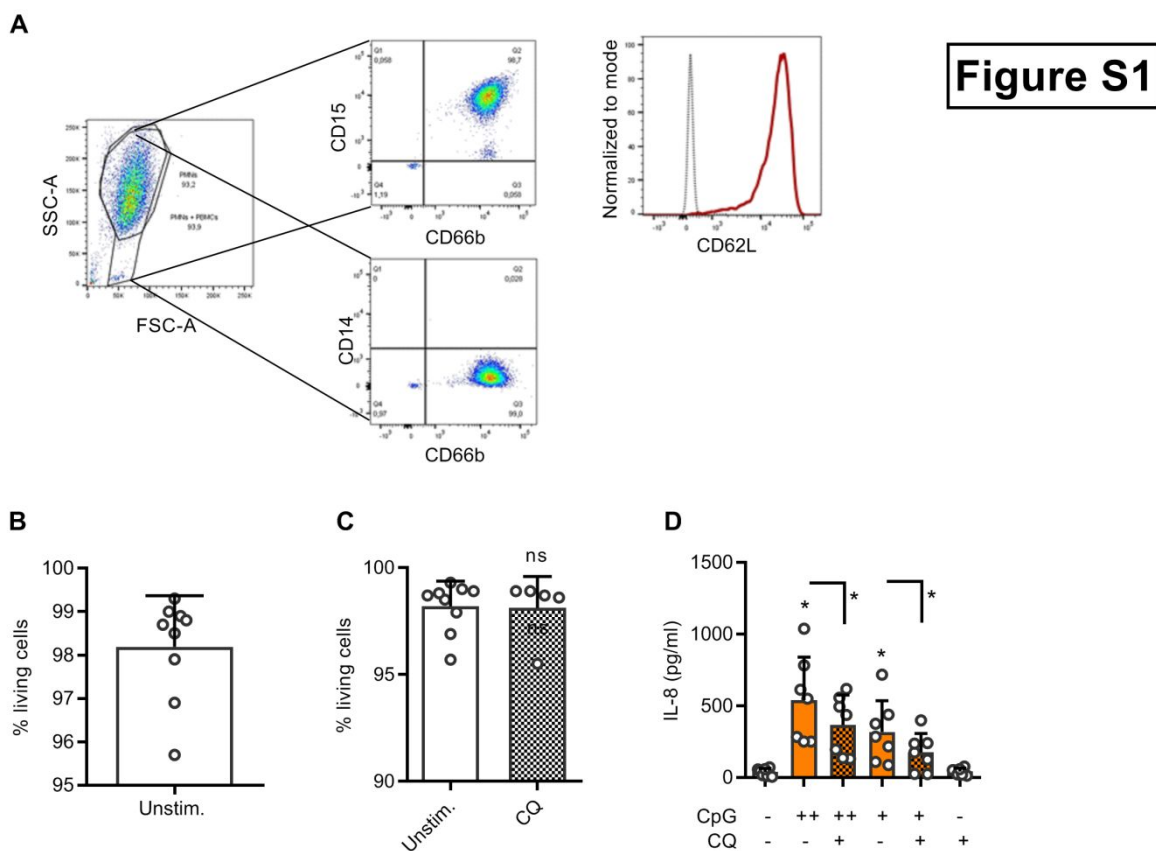**Supplementary Figure 1: Viability of primary PMNs is not compromised during *in vitro* treatments**

(A) FACS analysis of from whole blood isolated PMNs. CD66b<sup>high</sup>CD15<sup>high</sup>CD14<sup>low</sup> events were considered as PMNs. CD62L-positivity indicates cells were not pre-activated directly after isolation. Aqua Live-dead flow cytometric viability analysis of unstimulated PMNs after 4 h in culture (B, n=9 combined from several experiments) and including chloroquine (CQ) 30 min pre-incubation (C, n=5-8). (D) as in B but including CpG stimulation and ELISA analysis as indicated (n=7). In A one example representative of several donors is shown. B-D represent combined data (mean±SD) from 'n' biological replicates (each dot represents one donor). \* p<0.05 according to Wilcoxon signed rank sum (C) and one-way ANOVA with Sidak correction (D). Source data is provided as a Source data file.

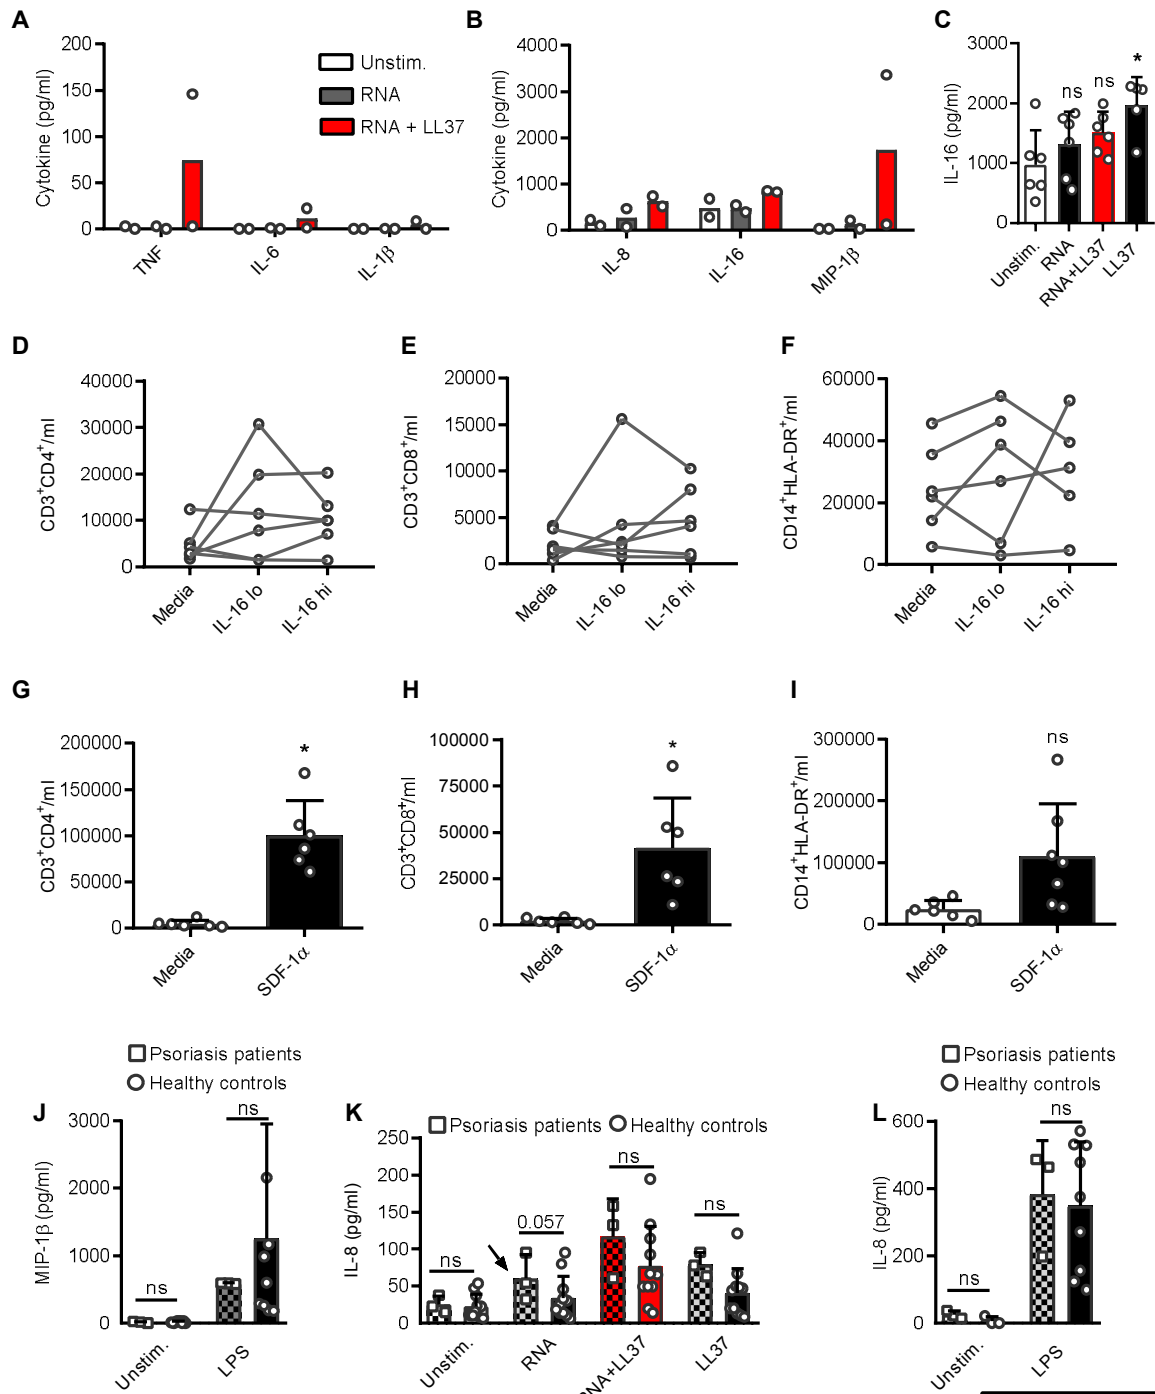

**Figure S2**

**Supplementary Figure 2: Cytokine and migration responses in treated PMNs**

(A, B) Luminex multiplex cytokine analysis of PMN supernatants (screening analysis). Mean values of TNF- $\alpha$ , IL-1 $\beta$ , IL-6, IL-16 and MIP-1 $\beta$  for n=2 donors shown. (C) IL-16 secreted from PMNs stimulated for 4 h as indicated (n=6). (D-I) Flow cytometric cell count of migrated CD4<sup>+</sup> T cells (D,G), CD8<sup>+</sup> T cells

(E,H) and CD14<sup>+</sup>HLA-DR<sup>+</sup> monocytes (F,I) quantified in transwell assays with total PBMCs in the upper and (D-F) IL-16 (300 – 1500 pg/ml) or (G-I) SDF-1 $\alpha$  (positive control, 100 ng/ml) in the lower compartment (n=6-7, p>0.05 for treatments vs. media). ELISA of MIP-1 $\beta$  (J) or IL-8 (K, L) secreted from psoriasis PMNs (n=3) or PMNs from sex-and age-matched healthy donors (n=3-9) in response to LPS (J, L) or RNA-LL37 complex (K) treatment. Only responses to treatment compared. Combined data (mean+SD) from 'n' biological replicates (each dot represents one donor) throughout. \* p<0.05 according to Friedmann test with Dunn's correction (D, E, F), Student's t-test (G-I) or Kruskal-Wallis test with Dunn's correction (C, J-L). Source data is provided as a Source data file.

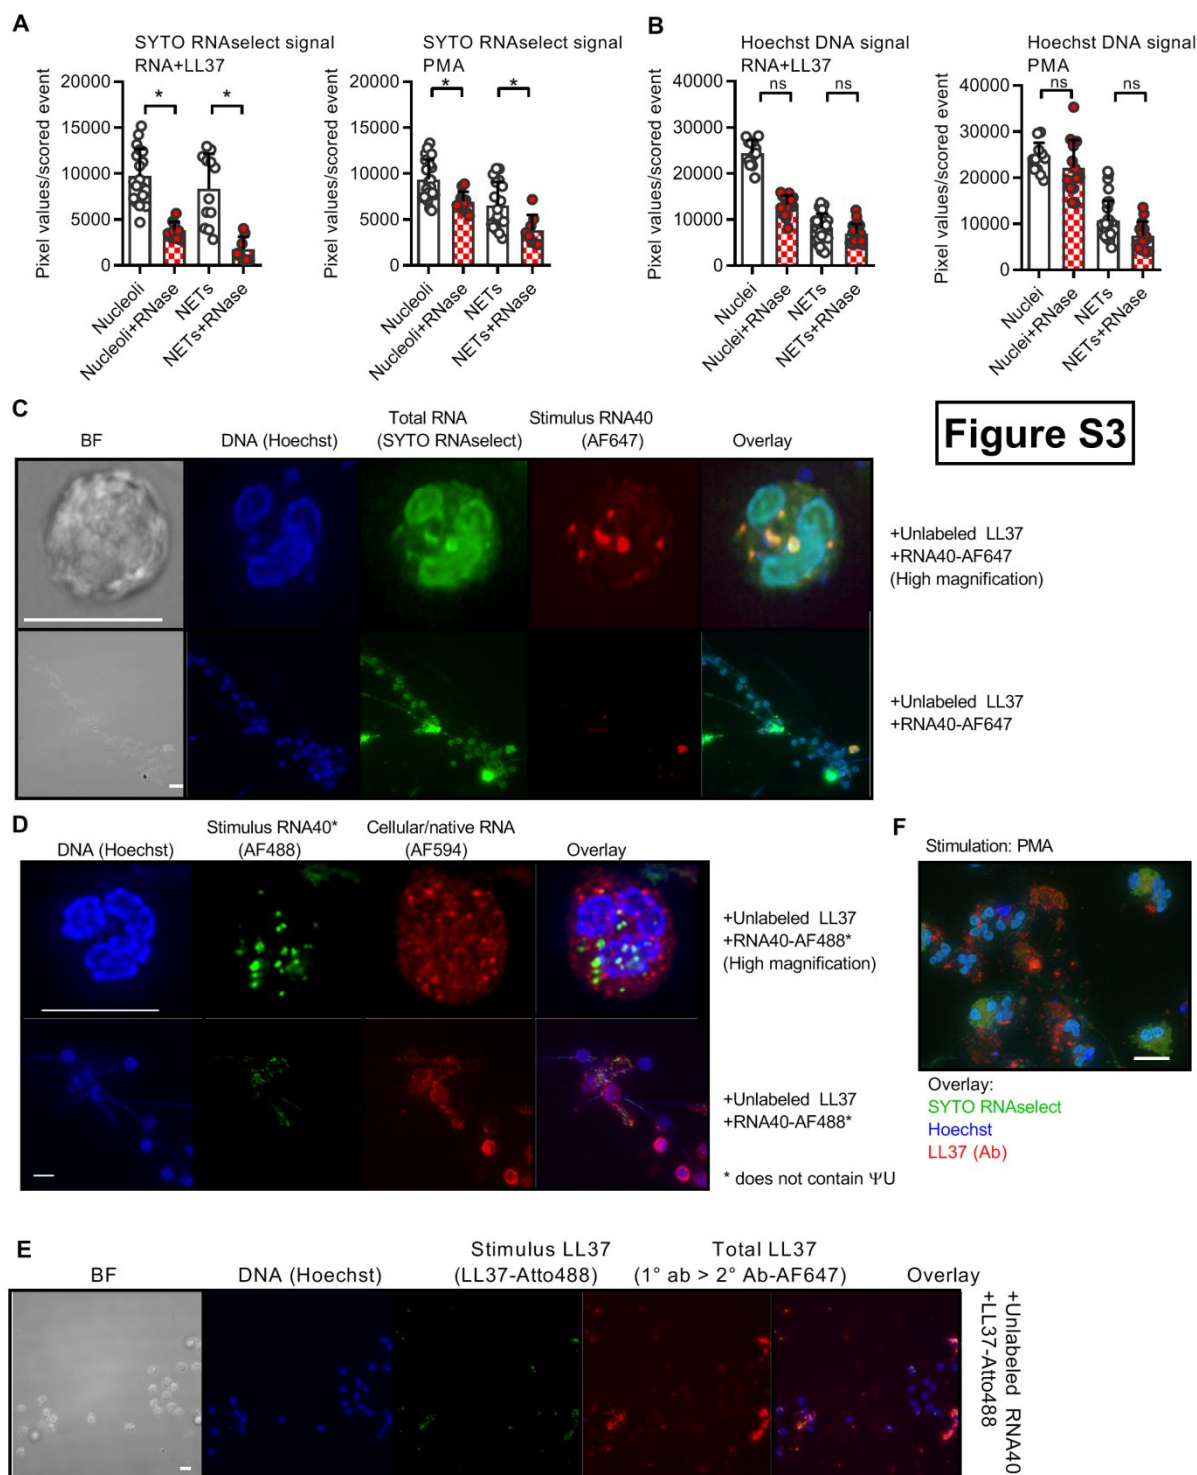

### Supplementary Figure 3: RNA staining in PMNs and skin sections is specific

(A, B) Specificity of SYTO RNaselect staining: Fixed NETs were treated with RNase A or buffer control (n=4) and quantification of pixel values of nuclear or NET events scored by a blinded observer in the RNA (A) or DNA channels (B) is shown for one representative experiment. Microscopy analysis of PMNs stimulated with either RNA-Alexa647 (C) or RNA-Alexa488 (D) and unlabeled LL37 (C, D) or unlabeled RNA and LL37-Atto488 (E) to distinguish exogenously added RNA (red in C, green in D) or

LL37 (green in E) from endogenously released RNA (green in C, SYTO RNaselect; red in D, anti-ΨU and Alexa594-conjugated secondary Ab) or LL37 (red in E, anti-LL37 and Alexa647-conjugated secondary Ab). n=2 for all experiments. (F) Staining for RNA in granule-like patterns observed for selected PMNs. In A and B combined data (mean+SD) from n biological replicates (each dot represent pixel values from one picture) are shown. In C-F one representative of 'n' replicates is shown. \* p<0.05 according to one-way ANOVA with Holm-Sidak's correction (A) or Kruskal-Wallis test with Dunn's correction (B) to adjust for multiple testing. Source data is provided as a Source data file.

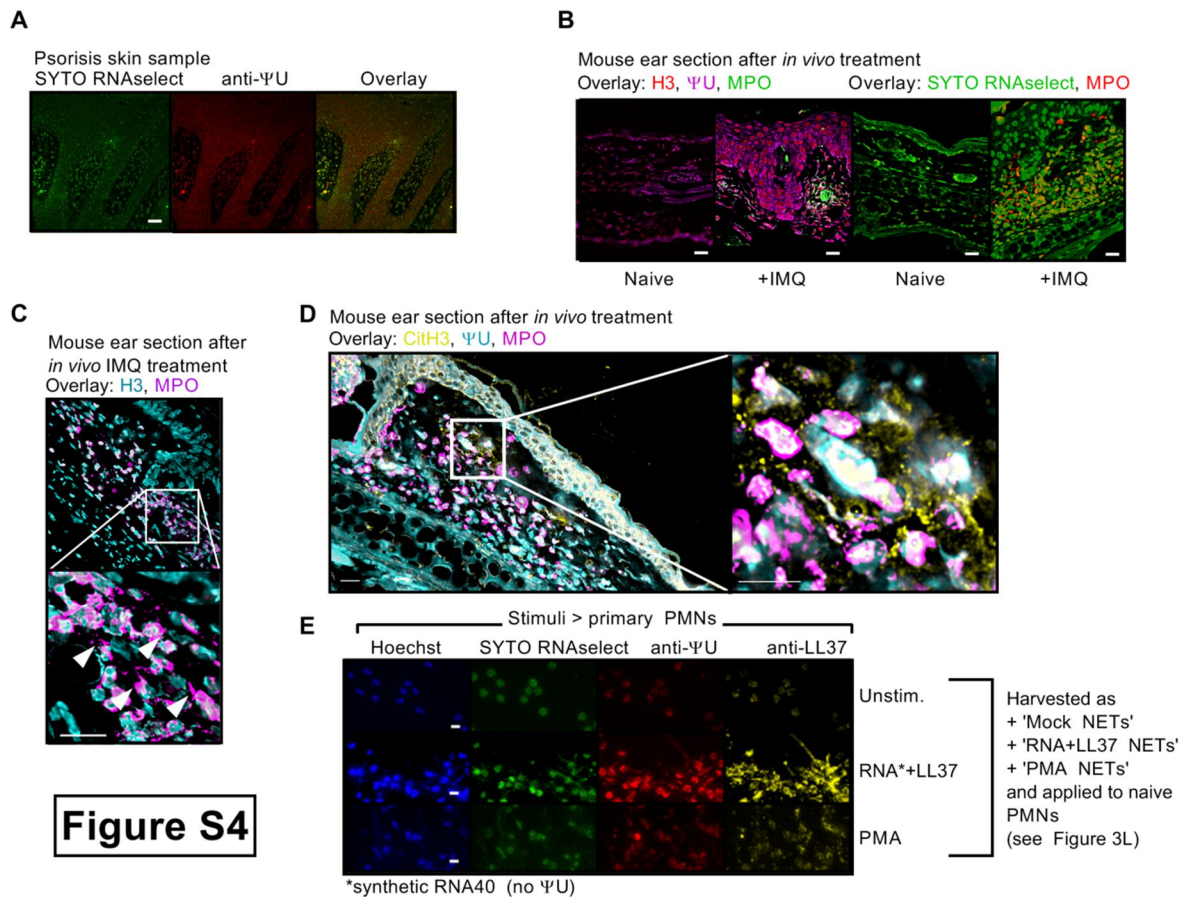

#### Supplementary Figure 4: RNA-LL37 in human psoriasis lesions and mouse ears *in vivo*

(A) SYTO RNaselect and anti-ΨU staining strongly overlap in human skin samples (n=12 patients and 3 healthy controls, scale bar = 20 μm). (B, C) IMQ-induced experimental psoriasis model: representative IF staining of ear sections from C57BL/6 mice treated *in vivo* and subsequently stained as indicated (n=4-5 for each group, scale bar = 20 μm, close-up shown in C, arrowheads indicate NET-like structures). (D) Intradermal injections of mouse ears with RNA-LL37 complexes. Close-up shows extracellular RNA and citH3 (NET-like structures, scale bar = 20 μm, n=6). (E) Immunofluorescence of primary PMNs isolated from human healthy donors which released NETs (n=3; scale bar = 10 μm). These were harvested as 'Mock NETs', 'RNA+LL37 NETs' or 'PMA NETs', respectively, and applied to naïve PMNs (see Fig. 3L). In A-E one representative of 'n' replicates is shown.

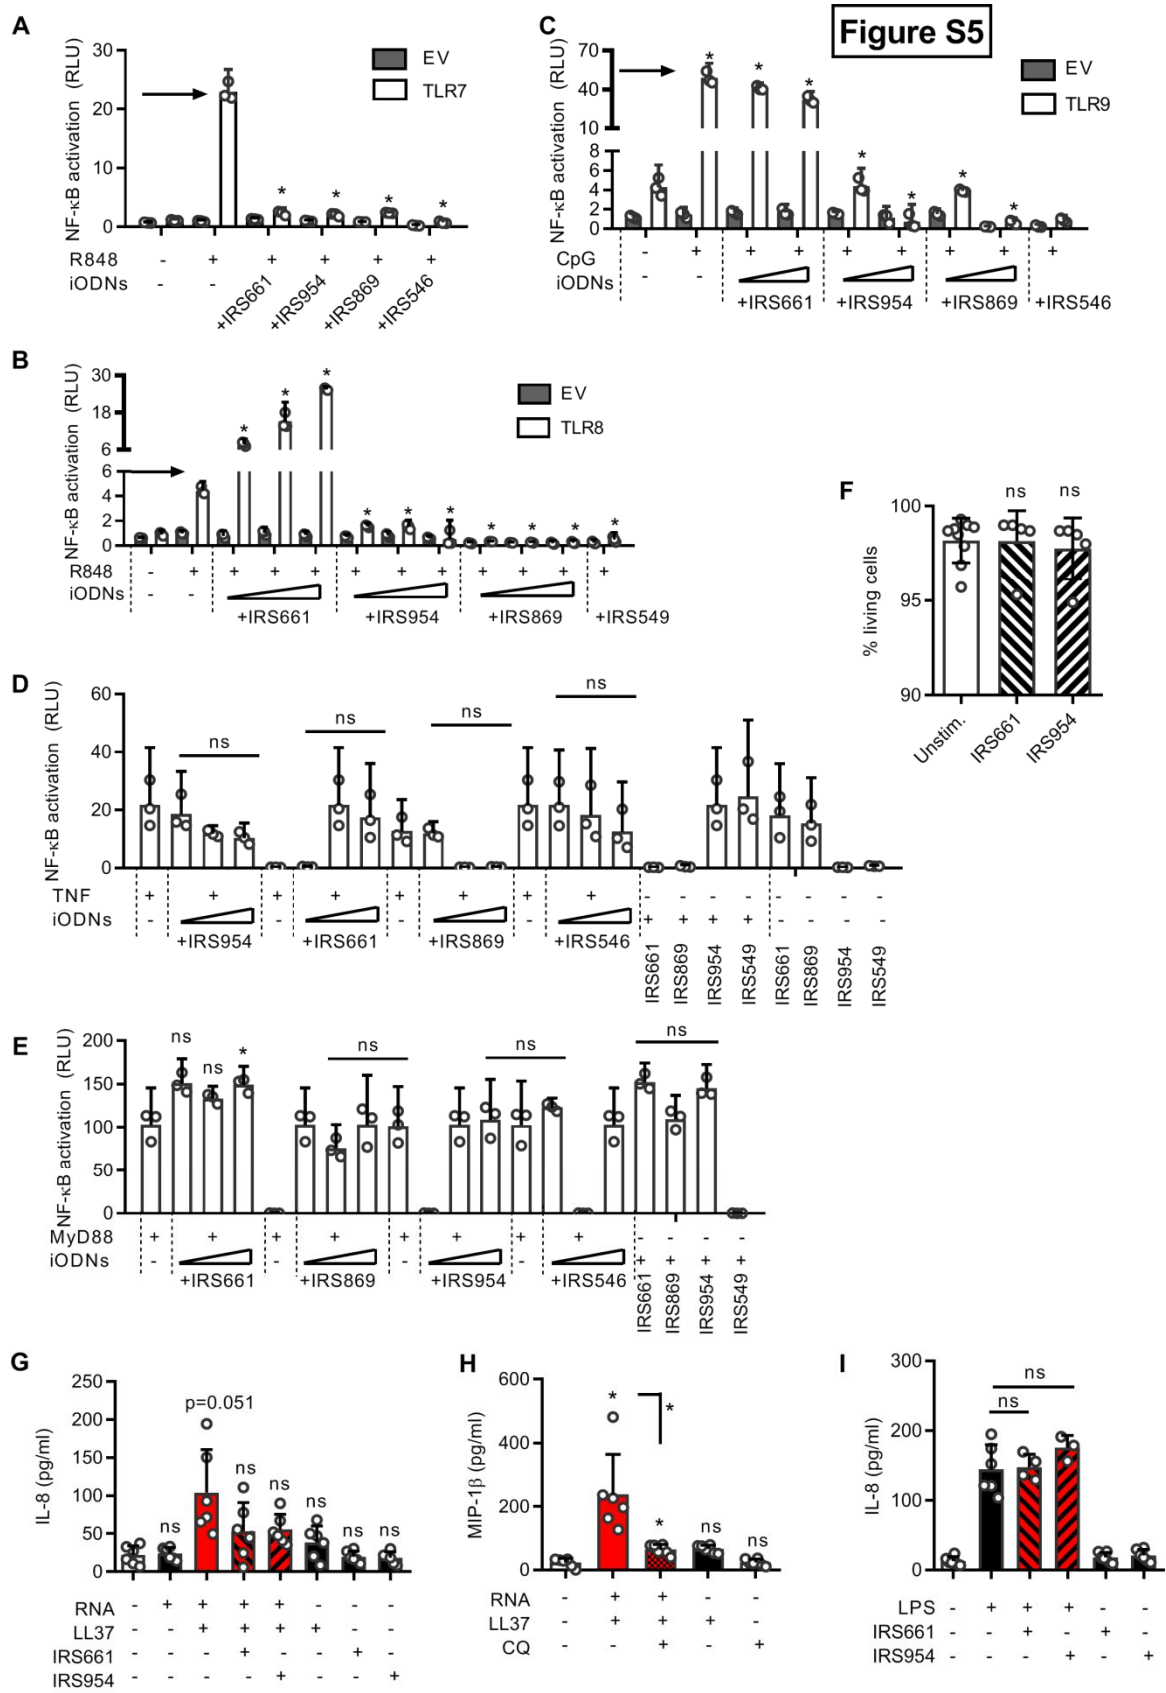



**Supplementary Figure 5: Specificity of iODNs on TLR8-dependent signaling**

(A-E) NF- $\kappa$ B dual luciferase reporter assay in HEK293 cells, transfected with NF- $\kappa$ B firefly luciferase reporter, *Renilla* control reporter and plasmids for either TLR7 (A), TLR8 (B), TLR9 (C) or MyD88 (E) or an equivalent amount of empty plasmid (EV) (D), subsequently stimulated with R848 (A, B), CpG ODN (C), recombinant TNF (D) or left unstimulated (E), without (arrow) or with IRS661, IRS954, IRS869 and IRS546 (n=2 each). Arrows indicate the level of stimulation observed in the absence of IRS. (F) Aqua Live-dead flow cytometric viability analysis of PMNs treated with IRS661 and IRS954 only (4 h, n=5-9). (G, I) IL-8 release from PMNs stimulated with RNA-LL37 complexes (G, n=6) or LPS (I, n=4-6) with or without IRS661 (1 nM), IRS954 (50 nM) pre-incubation (30 min) quantified by ELISA. (H) as in G but stimulation with RNA-LL37 complexes and pre-incubation (30 min) with chloroquine (CQ, 10  $\mu$ M) and measuring MIP-1 $\beta$  release (n=6). F-H represent combined data (mean+SD) from 'n' biological replicates (each dot represents one donor). In A-E one representative of 'n' replicates is shown (mean+SD). \* p<0.05 according to two-way ANOVA with Dunnett's correction (A-C), one-way ANOVA with Dunnett's correction (only TNF or MyD88 group, respectively, in D, E), Kruskal-Wallis test with Dunn's correction (F) or one-way ANOVA with Sidak correction (G, H, I). Source data is provided as a Source data file.

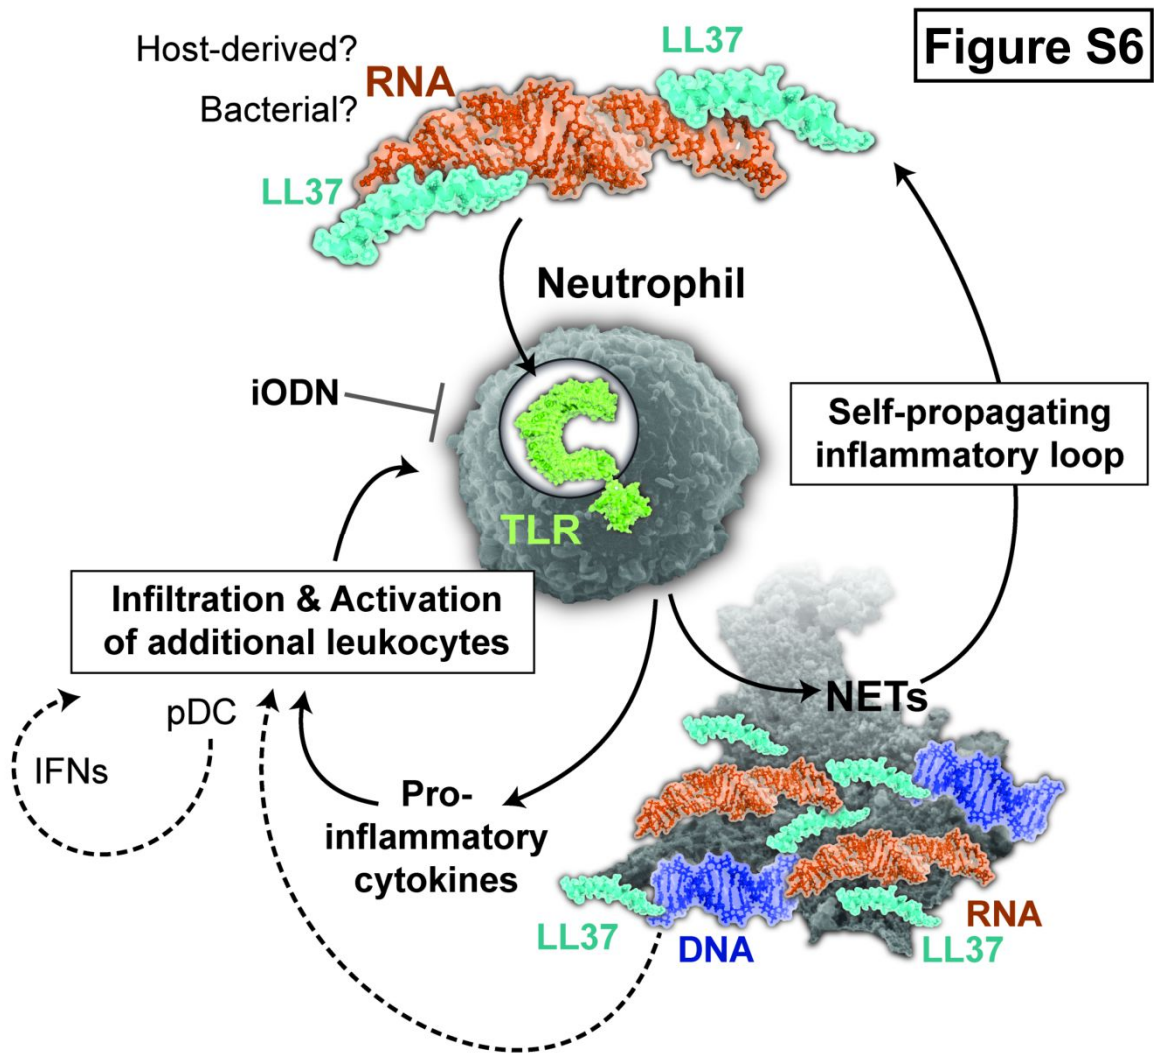

**Supplementary Figure 6: Graphical summary of key findings**

By releasing cytokines and RNA-LL37-containing NETs PMNs may fuel a self-propagating inflammatory cycle in psoriasis.

**Supplementary Tables****Supplementary Table 1: Summary of primary PMN responses across experiments.**

| Analyte | LPS | PMA | R848 | RNA | Pam2 | Pam3 | CpG DNA | genomic DNA/ssDNA | RNA + LL37 | genomic DNA/ssDNA + LL37 |
|---------|-----|-----|------|-----|------|------|---------|-------------------|------------|--------------------------|
| IL-8    | ++  | +++ | ++   | +/- | +++  | ++   | +++     | -                 | ++         | -                        |
| CD62L   | +++ | +++ | -    | -   | +++  | ++   | +++     | -                 | +          | -                        |
| ROS     | +/- | +++ | -    | -   | -    | -    | -       | -                 | -          | -                        |

**Supplementary Table 2: Commercial TLR ligands and inhibitors**

| Component          | company   | Product     |
|--------------------|-----------|-------------|
| LL37               | InvivoGen | tlrl-l37    |
| LPS-EK (ultrapure) | InvivoGen | tlrl-peklps |
| R848 (Resiquimod)  | InvivoGen | tlrl-r848-5 |
| Chloroquine        | InvivoGen | tlrl-chq    |
| PMA                | InvivoGen | tlrl-pma    |
| Pam2CSK4           | InvivoGen | tlrl-pm2s-1 |
| Pam3CSK4           | InvivoGen | tlrl-pms    |

**Supplementary Table 3: RNA/DNA and inhibitors**

| <b>Component</b> | <b>Sequence</b>                                     | <b>company</b> |
|------------------|-----------------------------------------------------|----------------|
| CpG2006          | 5'TsCsGsTsCsGsTsTsTsTsGsTsCsGsTsTsTsTsGsTsCsGsTsT3' | TIB            |
| RNA40            | 5'GsCsCsCsGsUsCsUsGsUsUsGsUsGsUsGsAsCsUsC3'         | iba            |
| ssDNA60          | 5'AC(AC) <sub>28</sub> AC3'                         | TIB            |
| IRS546           | 5'TsCsCsTsGsCsAsGsGsTsTsAsAsGsT3'                   | TIB            |
| IRS661           | 5'TsGsCsTsTsGsCsAsAsGsCsTsTsGsCsAsAsGsCsA3'         | TIB            |
| IRS869           | 5'TsCsCsTsGsGsAsGsGsGsTsTsGsT3'                     | TIB            |
| IRS954           | 5'TsGsCsTsCsCsTsGsGsAsGsGsGsTsTsGsT3'               | TIB            |

ssRNA40 was obtained from IBA. The backbone is phosphorothioate.

**Supplementary Table 4: Antibodies and recombinant proteins**

| <b>Item</b>                                  | <b>fluorophore</b> | <b>species</b> | <b>isotype</b> | <b>company</b>    | <b>Product no.</b> |
|----------------------------------------------|--------------------|----------------|----------------|-------------------|--------------------|
| <b>Isotype control</b>                       | PE                 | mouse          | IgG1 kappa     | eBioscience       | 12471442           |
| <b>Isotype control</b>                       | FITC               | mouse          | IgM            | BioLegend         | 401605             |
| <b>Isotype control</b>                       | APC                | mouse          | IgG1 kappa     | BD Bioscience     | 550854             |
| <b>Isotype control</b>                       | BV421              | mouse          | IgG1 kappa     | BioLegend         | 400157             |
| <b>Isotype control</b>                       | AF488              | mouse          | IgG2a kappa    | BioLegend         | 400233             |
| <b>Isotype control</b>                       | FITC               | mouse          | IgG2b          | BioLegend         | 401206             |
| <b>Anti-hCD15</b>                            | PE                 | mouse          | IgG1 kappa     | BioLegend         | 323006             |
| <b>Anti-hCD66b</b>                           | FITC               | mouse          | IgG1 kappa     | BioLegend         | 305103             |
| <b>Anti-hCD62L</b>                           | BV421              | mouse          | IgG1 kappa     | BioLegend         | 30482              |
| <b>Anti-hCD14</b>                            | PE                 | mouse          | IgG1 kappa     | ImmunoTools       | 21620144           |
| <b>Anti-hCD3</b>                             | AF488              | mouse          | IgG2a          | BioLegend         | 317310             |
| <b>Anti-hCD4</b>                             | PE                 | mouse          | IgG1 kappa     | BioLegend         | 300508             |
| <b>Anti-hCD11b</b>                           | APC                | mouse          | IgG1 kappa     | BioLegend         | 301310             |
| <b>Anti-hCD19</b>                            | BV421              | mouse          | IgG1 kappa     | BioLegend         | 302234             |
| <b>Anti-hCD8</b>                             | APC                | mouse          | IgG1 kappa     | ImmunoTools       | 21810086           |
| <b>Anti-hHLA-DR</b>                          | FITC               | mouse          | IgG2b kappa    | BioLegend         | 327006             |
| <b>Recombinant hMIP-1<math>\beta</math></b>  | -                  | -              | -              | ImmunoTools       | 11343223           |
| <b>Recombinant hIL-16</b>                    | -                  | -              | -              | ImmunoTools       | 11340163           |
| <b>Recombinant hSDF-1<math>\alpha</math></b> | -                  | -              | -              | ImmunoTools       | 11343363           |
| <b>SYTO RNAselect</b>                        | n/a                | -              | -              | ThermoFisher      | S32703             |
| <b>Anti-hLL37</b>                            | unconjugated       | rabbit         | IgG            | LSBio             | LS-B6696-500       |
| <b>Anti-<math>\psi</math>U</b>               | unconjugated       | mouse          | IgG1           | MBL               | MBL-D347-3         |
| <b>Anti-hNeutrophil Elastase</b>             | unconjugated       | mouse          | IgG1           | Novus Biologicals | MAB91671-100       |
| <b>Anti-h/m MPO</b>                          | unconjugated       | goat           | IgG            | R&D systems       | AF3667             |
| <b>Anti-Histone H3</b>                       | unconjugated       | rabbit         | IgG            | Novus Biologicals | NB500-171          |
| <b>Anti-citrullinated Histone H3</b>         | unconjugated       | rabbit         | IgG            | abcam             | ab5103             |
| <b>Anti-rabbit IgG</b>                       | AF647              | chicken        | IgY            | ThermoFisher      | A-21443            |
| <b>Anti-mouse IgG</b>                        | AF594              | chicken        | IgY            | ThermoFisher      | A-21201            |
| <b>Anti-mouse IgG</b>                        | AF488              | chicken        | IgY            | ThermoFisher      | A-21200            |
| <b>Anti-goat IgG</b>                         | AF594              | chicken        | IgY            | ThermoFisher      | A- 21468           |

**Supplementary Table 5: Plamids used for HEK293T transfection**

| Plasmid name            | Insert | Vector backbone                         | Insert                                  |
|-------------------------|--------|-----------------------------------------|-----------------------------------------|
| EGFP                    |        | pC1-EGFP                                | EGFP                                    |
| NF- $\kappa$ B reporter |        | pGL3                                    | 6x NFKB response element                |
| Renilla                 |        | pRL-TK                                  | Renilla                                 |
| hTLR7                   |        | pcDNA3.1 (+)                            | hTLR7                                   |
| hTLR8                   |        | pcDNA3.1 (+)                            | hTLR8                                   |
| hTLR9                   |        | pEF-SEM                                 | hTLR9                                   |
| MyD88                   |        | pTO-N-SH Streptag<br>N-terminal Gateway | hMyD88 FL aa13-296<br>L265P, Stop-codon |
| pcDNA3.1                |        | pcDNA3.1 (+)                            | Empty                                   |
| pEF-SEM                 |        | pEF-SEM                                 | Empty                                   |

**Supplementary Table 6: 10x Ammonium chloride erythrocyte lysis buffer**

| <b>Compound</b>                                | <b>company</b> | <b>Product no.</b> |
|------------------------------------------------|----------------|--------------------|
| 1.54 M NH <sub>4</sub> Cl                      | Roth           | 5470.1             |
| 100 mM KHCO <sub>3</sub>                       | Fluka          | 60220              |
| 1 mM EDTA; pH 8                                | ThermoFisher   | 15575020           |
| dissolved in Ampuwa water                      | Fresenius Kabi | 1833               |
| pH adjusted to 7.3, sterile filtered (0.22 µm) |                |                    |
